# Supplementary material for: Rapid and accurate detection of KRAS mutations in colorectal cancers using the isothermal-based optical sensor for companion diagnostics
Source: PubMed Central journal article supplement (PMC5663560; doi:10.18632/oncotarget.20038), 2017-08-08
Supplement: oncotarget-08-83860-s001.pdf [file oncotarget-08-83860-s001.pdf]

## Rapid and accurate detection of *KRAS* mutations in colorectal cancers using the isothermal-based optical sensor for companion diagnostics

### SUPPLEMENTARY MATERIALS

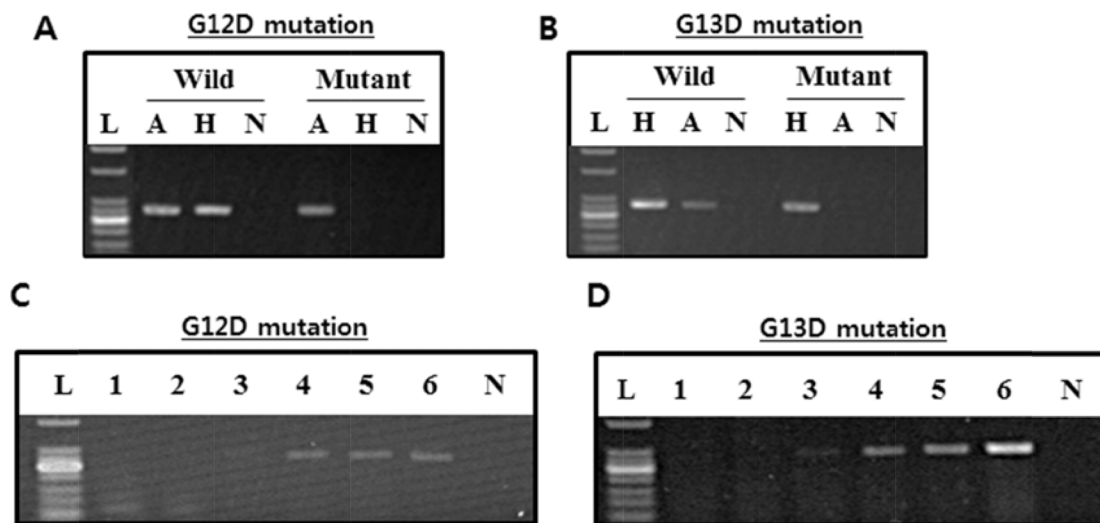

**Supplementary Figure 1: Characterization of *KRAS* mutant primers using PCR.** (A–B) Gel electrophoresis after PCR with the wild-type primer and G12D mutant primer (A; L: 50 bp DNA marker, A: DNA obtained from the AGS cell line, H: DNA obtained from the HCT116 cell line, N: no DNA). DNA amplification with the wild-type primer and G13D mutant primer (B; L: 50 bp DNA marker, A: DNA obtained from the AGS cell line, H: DNA obtained from the HCT116 cell line, N: no DNA). (C–D), Gel electrophoresis after PCR with the G12D mutant primer (C) and the G13D mutant primer (D) (L: 50 bp DNA marker, 1: 0%, 2: 1%, 3: 10%, 4: 30%, 5: 50%, 6: 100% of mutant cells, N: no DNA).

**Supplementary Table 1: Sequences of the primers used for PCR, Sequencing and ISAD-*KRAS* assay**

| Target | Type           | Sequence                                                                                              |
|--------|----------------|-------------------------------------------------------------------------------------------------------|
| G12D   | PCR (Wild)     | Forward: 5'-TGTGGTAGTTGGAGCTGG-3'                                                                     |
|        | PCR (Wild)     | Reverse: 5'-TCATGAAAATGGTCAGAGAAACC-3'                                                                |
|        | PCR (Mutation) | Forward: 5'-TGTGGTAGTTGGAGCTGA-3'                                                                     |
|        | PCR (Mutation) | Reverse: 5'-TCATGAAAATGGTCAGAGAAACC-3'                                                                |
|        | ISAD           | Forward: 5'-NH <sub>2</sub> -(CH <sub>2</sub> ) <sub>12</sub> -CTGAATATAAACTTGTGGTAGTTGGAGCTGA-3'     |
|        | ISAD           | Reverse: 5'-NH <sub>2</sub> -(CH <sub>2</sub> ) <sub>12</sub> -CTCATGAAAATGGTCAGAGAAACCTTTATC-3'      |
| G13D   | PCR (Wild)     | Forward: 5'-TGTGGTAGTTGGAGCTGGTGG-3'                                                                  |
|        | PCR (Wild)     | Reverse: 5'-TCATGAAAATGGTCAGAGAAACC-3'                                                                |
|        | PCR (Mutation) | Forward: 5'-TGTGGTAGTTGGAGCTGGTGAG-3'                                                                 |
|        | PCR (Mutation) | Reverse: 5'-TCATGAAAATGGTCAGAGAAACC-3'                                                                |
|        | ISAD           | Forward: 5'-NH <sub>2</sub> -(CH <sub>2</sub> ) <sub>12</sub> -CTGAATATAAACTTGTGGTAGTTGGAGCTGGTGAG-3' |
|        | ISAD           | Reverse: 5'-NH <sub>2</sub> -(CH <sub>2</sub> ) <sub>12</sub> -CTCATGAAAATGGTCAGAGAAACCTTTATC-3'      |
| Exon 2 | Sequencing     | Forward: 5'-TCATTATTTTTATTATAAGGCCTGCT-3'                                                             |
|        | Sequencing     | Reverse: 5'-CAAGATTACCTCTATTGTTGGATC-3'                                                               |

**Supplementary Table 2: Accuracy of *KRAS* mutation detection in 70 clinical samples using PCR, direct sequencing and ISAD-*KRAS* assay**

| Sample (reference) | Total tested sample | Positive sample  |                  |                   |                  |                |                  |
|--------------------|---------------------|------------------|------------------|-------------------|------------------|----------------|------------------|
|                    |                     | PCR result       |                  | Sequencing result |                  | ISAD Result    |                  |
|                    |                     | G12D             | G13D             | G12D              | G13D             | G12D           | G13D             |
| Wild               | 20                  | 0                | 0                | 0                 | 0                | 4*             | 1*               |
| G12D               | 24                  | 22               | 0                | 21                | 0                | 24             | 0                |
| G13D               | 26                  | 0                | 25               | 0                 | 22               | 0              | 26               |
| Total              | 70                  | 22/70<br>(31.4%) | 25/70<br>(35.7%) | 21/70<br>(30%)    | 22/70<br>(31.4%) | 28/70<br>(40%) | 27/70<br>(38.6%) |

\* Newly detected mutations in wild-type samples using ISAD.

**Supplementary Table 3: Results of end-point PCR, direct sequencing and ISAD-*KRAS* assays in 70 clinical samples. See Supplementary\_Table\_3**
